# Supplementary material for: Prognositic value of CD73-adenosinergic pathway in solid tumor: A meta-analysis and systematic review
Source: PubMed Central journal article supplement (PMC5593644; doi:10.18632/oncotarget.16905), 2017-04-06
Supplement: oncotarget-08-57327-s001.pdf [file oncotarget-08-57327-s001.pdf]

## **Prognostic value of CD73-adenosinergic pathway in solid tumor: A meta-analysis and systematic review**

### **Supplementary Materials**

**Supplementary Table 1: Evaluation of human CD73 expression in the selected studies.**

See Supplementary\_Table\_1
